# Supplementary material for: Synthesis and derivatization of epoxy-functional sterically-stabilized diblock copolymer spheres in non-polar media: does the spatial location of the epoxy groups matter?
Source: Royal Society of Chemistry journal article supplement (doi:10.1039/d2py00559j), 2022-01-01
Supplement: d2py00559j1.pdf [file d2py00559j1.pdf]

## Supporting Information for:

### *Synthesis and Derivatization of Epoxy-Functional Sterically-Stabilized Diblock Copolymer Spheres in Non-Polar Media: Does the Spatial Location of the Epoxy Groups Matter?*

Csilla György<sup>a</sup>, Timothy Smith<sup>b</sup>, David J. Gowney<sup>b</sup> and Steven P. Armes<sup>a,\*</sup>

#### Table of Contents

|                                                                                                                                                                                                                                                                                                  |     |
|--------------------------------------------------------------------------------------------------------------------------------------------------------------------------------------------------------------------------------------------------------------------------------------------------|-----|
| <b>Figure S1.</b> Experimental setup for nanoparticle derivatization using acetic acid .....                                                                                                                                                                                                     | S2  |
| <b>Figure S2.</b> <sup>1</sup> H NMR spectra recorded for PLMA <sub>63</sub> -PGlyMA <sub>89</sub> and P(LMA <sub>50</sub> - <i>stat</i> -GlyMA <sub>9</sub> )-PMMA <sub>67</sub> diblock copolymers .....                                                                                       | S2  |
| <b>Figure S3.</b> GPC curves recorded for the PLMA <sub>63</sub> and P(LMA <sub>50</sub> - <i>stat</i> -GlyMA <sub>9</sub> ) precursors and the PLMA <sub>63</sub> -PGlyMA <sub>89</sub> and P(LMA <sub>50</sub> - <i>stat</i> -GlyMA <sub>9</sub> )-PMMA <sub>67</sub> diblock copolymers ..... | S3  |
| <b>Figure S4.</b> Assigned <sup>1</sup> H NMR spectra recorded for the model reaction of GlyMA with benzylamine .....                                                                                                                                                                            | S4  |
| <b>Figure S5.</b> <sup>1</sup> H NMR spectra recorded for the reaction of the P(LMA <sub>50</sub> - <i>stat</i> -GlyMA <sub>9</sub> )-PMMA <sub>67</sub> nanoparticles with various amines .....                                                                                                 | S5  |
| <b>Figure S6.</b> Assigned <sup>1</sup> H NMR spectra recorded for the reaction of GlyMA with 1-butanethiol and for the reaction of P(LMA <sub>50</sub> - <i>stat</i> -GlyMA <sub>9</sub> )-PMMA <sub>67</sub> with 1-butanethiol .....                                                          | S6  |
| <b>Figure S7.</b> Digital photograph recorded for a 20% w/w dispersion of P(LMA <sub>50</sub> - <i>stat</i> -GlyMA <sub>9</sub> )-PMMA <sub>67</sub> nanoparticles and the same dispersion after heating to 110 °C for 40 h .....                                                                | S7  |
| <b>Figure S8.</b> <sup>1</sup> H NMR spectra recorded for the P(LMA <sub>50</sub> - <i>stat</i> -GlyMA <sub>9</sub> )-PMMA <sub>67</sub> diblock copolymer on heating to 110 °C for 88 h under a N <sub>2</sub> atmosphere .....                                                                 | S7  |
| <b>Figure S9.</b> GPC curves recorded for the P(LMA <sub>50</sub> - <i>stat</i> -GlyMA <sub>9</sub> )-PMMA <sub>67</sub> diblock copolymer after heating to 40, 70 or 90 °C for 17 h .....                                                                                                       | S8  |
| <b>Figure S10.</b> <sup>1</sup> H NMR spectra and GPC curve recorded for the P(LMA <sub>50</sub> - <i>stat</i> -GlyMA <sub>9</sub> )-PMMA <sub>67</sub> diblock copolymer after heating a 1.0% w/w dispersion to 110 °C .....                                                                    | S8  |
| <b>Figure S11.</b> <sup>1</sup> H NMR spectra recorded for the PLMA <sub>63</sub> -PGlyMA <sub>89</sub> diblock copolymer after heating to 40, 70 or 90 °C for 17 h .....                                                                                                                        | S9  |
| <b>Figure S12.</b> FT-IR spectra recorded for the PLMA <sub>63</sub> -PGlyMA <sub>89</sub> diblock copolymer both before and after heating to 110 °C for 17 h .....                                                                                                                              | S9  |
| <b>Scheme S1.</b> Schematic representation of possible side-reactions that may occur for the PLMA <sub>63</sub> -PGlyMA <sub>89</sub> nanoparticles when reacting with 50% v/v aqueous acetic acid .....                                                                                         | S10 |

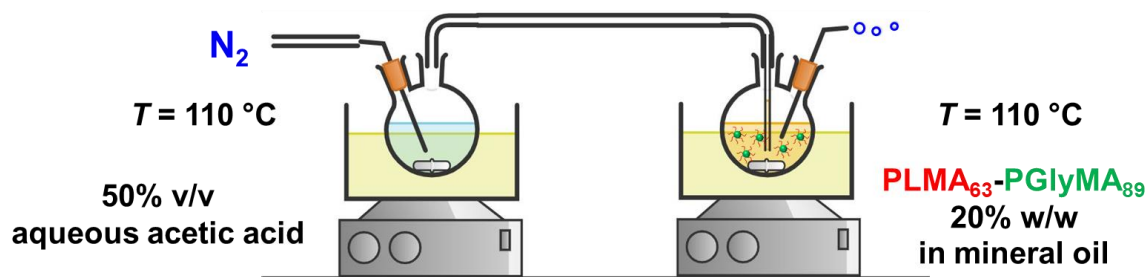

**Figure S1.** Experimental setup when reacting a 20% w/w dispersion of PLMA<sub>63</sub>-PGlyMA<sub>89</sub> nanoparticles in mineral oil with 50% v/v aqueous acetic acid at 110 °C.

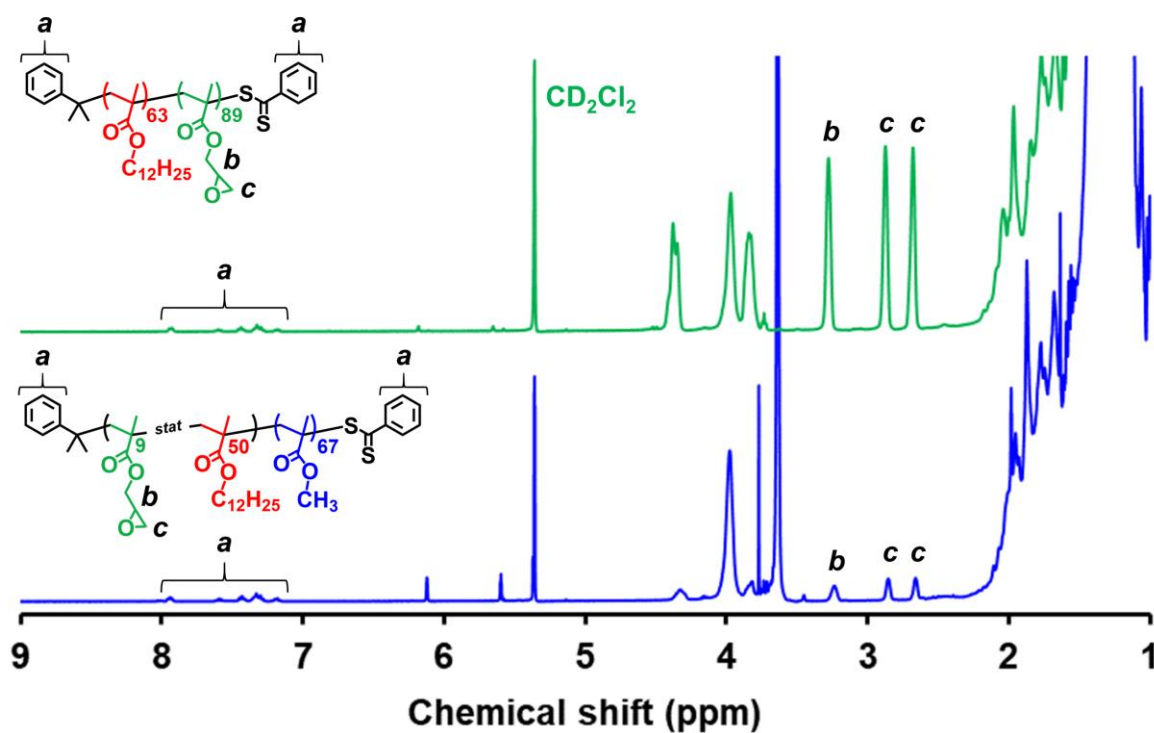

**Figure S2.** <sup>1</sup>H NMR spectra recorded in CD<sub>2</sub>Cl<sub>2</sub> for the PLMA<sub>63</sub>-PGlyMA<sub>89</sub> (green spectrum) and P(LMA<sub>50</sub>-stat-GlyMA<sub>9</sub>)-PMMA<sub>67</sub> (blue spectrum) diblock copolymers. To determine the degree of retention of the epoxy groups, the integrated aromatic proton signals *a* assigned to the copolymer end-groups at 7.10-8.00 ppm were compared to the intensity of the methine proton *b* assigned to the epoxy rings at 3.12-3.33 ppm.

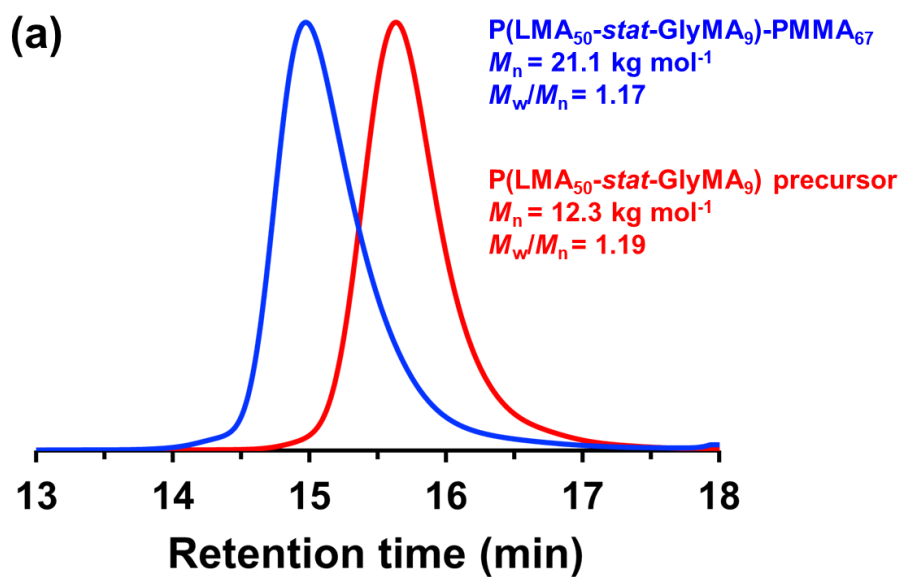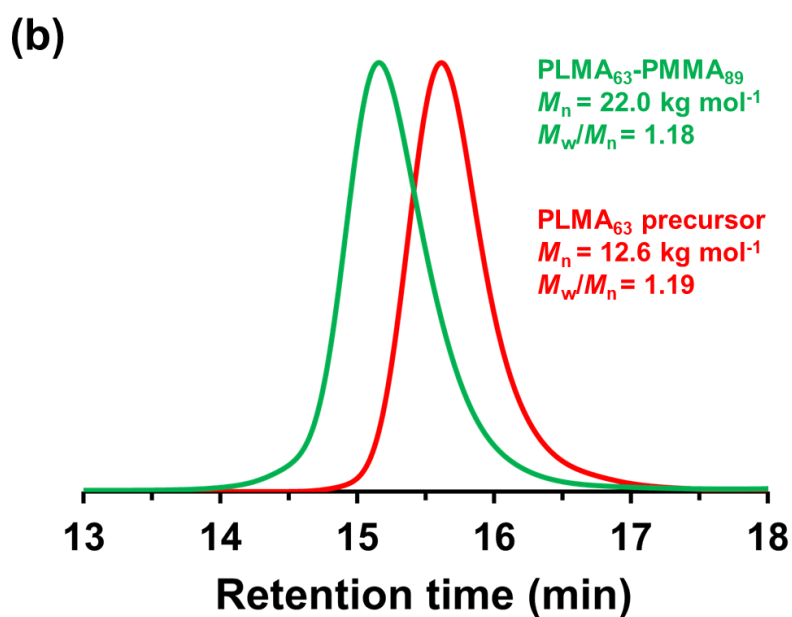

**Figure S3.** THF GPC curves (refractive index detector; vs. a series of near-monodisperse poly(methyl methacrylate) calibration standards) recorded for: (a) the  $PLMA_{63}$  precursor and the corresponding  $PLMA_{63}\text{-}GlyMA_{89}$  diblock copolymer; (b) the  $P(LMA_{50}\text{-}stat\text{-}GlyMA_9)$  precursor and the corresponding  $P(LMA_{50}\text{-}stat\text{-}GlyMA_9)\text{-}PMMA_{67}$  diblock copolymer.

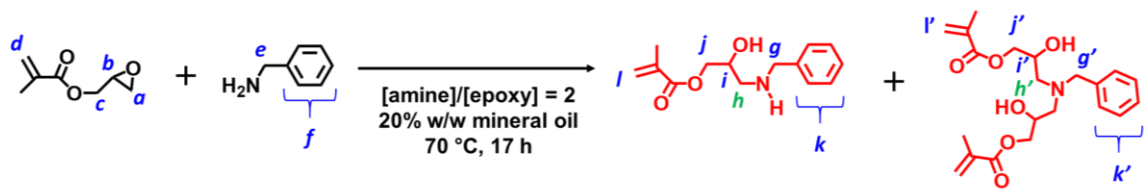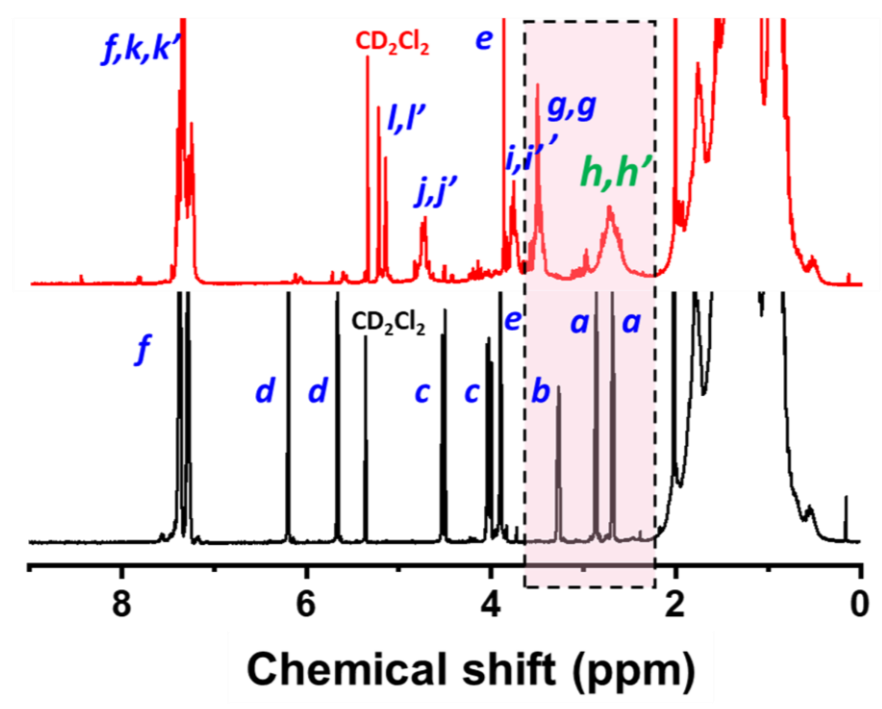

**Figure S4.** Assigned  $^1\text{H}$  NMR spectra recorded in  $\text{CD}_2\text{Cl}_2$  for the reaction between GlyMA and benzylamine: initial mixture (black spectrum) and after heating for 17 h at 70 °C (red spectrum). This reaction was conducted at 20% w/w solids in mineral oil using an [amine]/[epoxy] molar ratio of 2.0.

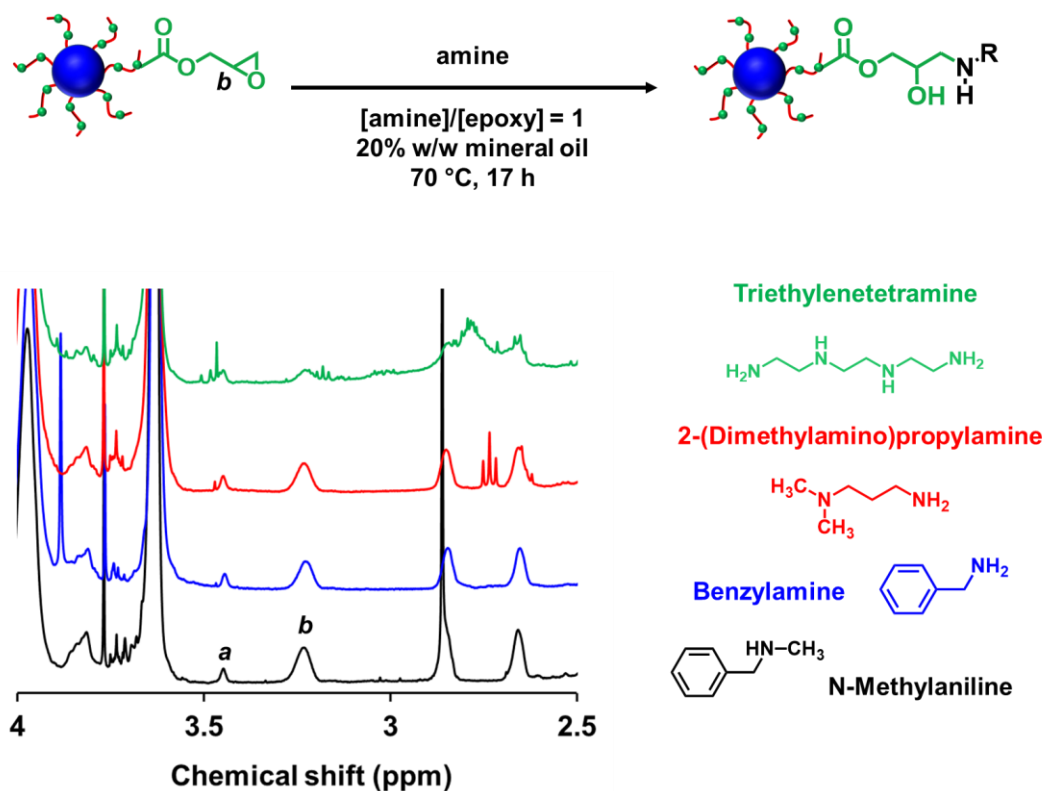

**Figure S5.**  $^1\text{H}$  NMR spectra recorded in  $\text{CD}_2\text{Cl}_2$  for a  $\text{P}(\text{LMA}_{50}\text{-stat-GlyMA}_9)\text{-PMMA}_{67}$  diblock copolymer after reacting a 20% w/w dispersion of such nanoparticles in mineral oil with each of the following four amines in turn: *N*-methylaniline (black spectrum), benzylamine (blue spectrum), 2-(dimethylamino)propylamine (red spectrum) or triethylenetetramine (green spectrum). Conditions: 70 °C for 17 h, [amine]/[epoxy] molar ratio = 1.0. By comparing satellite signal *a* assigned to the PMMA backbone at 3.43-3.47 ppm to the integrated methine signal *b* of the epoxy ring at 3.12-3.30 ppm, the approximate loss of the original epoxy groups was estimated to be 12%, 16%, 23% or 68% when using *N*-methylaniline, benzylamine, 2-(dimethylamino)propylamine or triethylenetetramine, respectively.

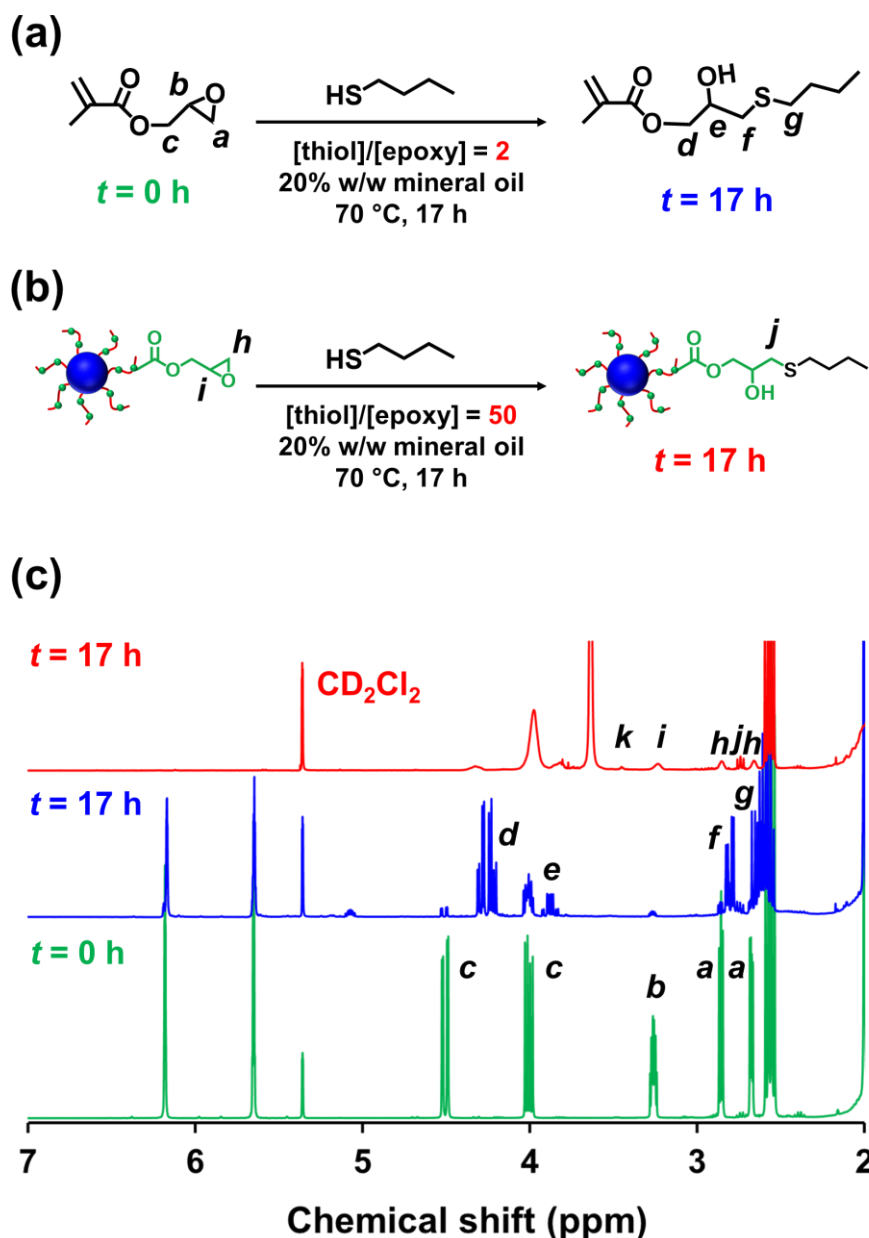

**Figure S6.** Schematic reaction of 1-butanethiol with (a) GlyMA monomer or (b) P(LMA<sub>50</sub>-*stat*-GlyMA<sub>9</sub>)-PMMA<sub>67</sub> nanoparticles. (c) Assigned <sup>1</sup>H NMR spectra recorded in CD<sub>2</sub>Cl<sub>2</sub> for a reaction mixture containing GlyMA and 1-butanethiol at 20% w/w solids in mineral oil at 0 h (green spectrum) and after heating at 70 °C for 17 h (blue spectrum) when using an [amine]/[epoxy] molar ratio of 2.0. The red spectrum was obtained for a P(LMA<sub>50</sub>-*stat*-GlyMA<sub>9</sub>)-PMMA<sub>67</sub> diblock copolymer after heating the corresponding 20% w/w copolymer dispersion in mineral oil at 70 °C for 17 h using a [thiol]/[epoxy] molar ratio of 50. A % loss of epoxy groups of 13% was determined by comparing the satellite signal *k* assigned to the PMMA backbone at 3.43-3.47 ppm to the methine signal *i* corresponding to the epoxide ring at 3.12-3.30 ppm.

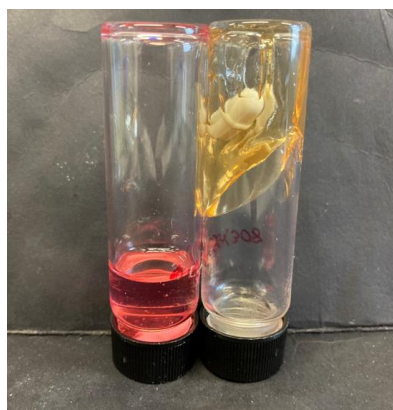

**Figure S7.** Digital photograph recorded for the original free-flowing 20% w/w dispersion of P(LMA<sub>50</sub>-*stat*-GlyMA<sub>9</sub>)-PMMA<sub>67</sub> nanoparticles (left-hand vial) and the viscous gel that is obtained after heating the same dispersion to 110 °C for 40 h (right-hand vial).

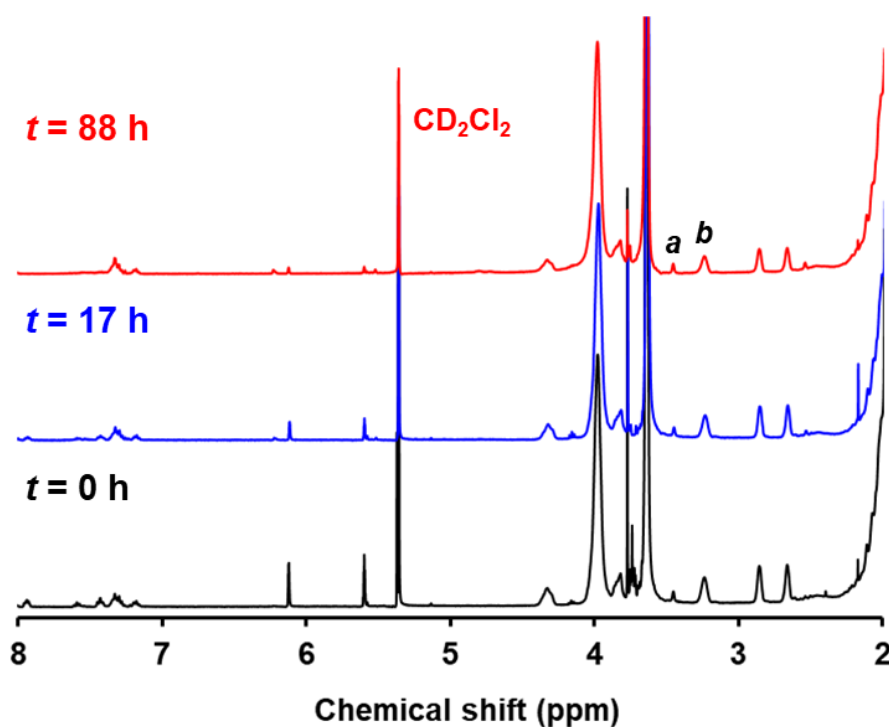

**Figure S8.** <sup>1</sup>H NMR spectra recorded in CD<sub>2</sub>Cl<sub>2</sub> for the P(LMA<sub>50</sub>-*stat*-GlyMA<sub>9</sub>)-PMMA<sub>67</sub> diblock copolymer for the initial reaction mixture (black spectrum) and after heating to 110 °C for either 17 h (blue spectrum) or 88 h (red spectrum). Prior to the heating experiment, the 20% w/w copolymer dispersion was deoxygenated using a stream of N<sub>2</sub> gas for 30 min. A loss of epoxy groups of 21% was calculated by comparing the satellite signal *a* assigned to the PMMA backbone at 3.43-3.47 ppm to the methine signal *b* corresponding to the epoxy ring at 3.12-3.30 ppm.

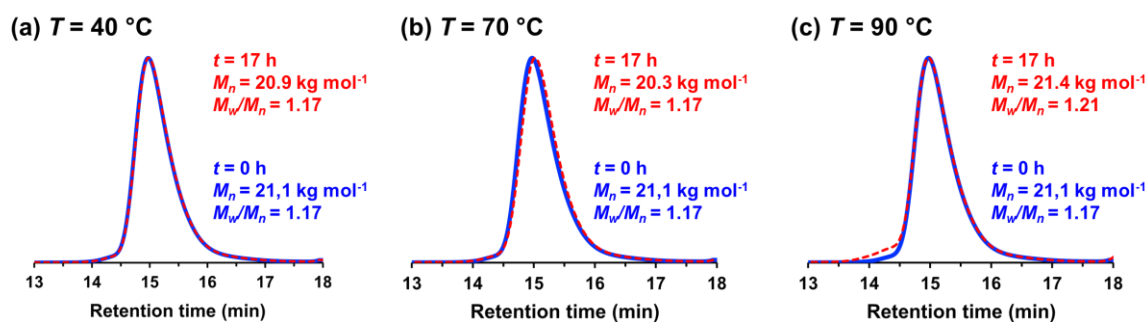

**Figure S9.** Comparison of the THF GPC curve recorded for the P(LMA<sub>50</sub>-stat-GlyMA<sub>9</sub>)-PMMA<sub>67</sub> diblock copolymer (prepared as a 20% w/w dispersion of nanoparticles in mineral oil at 90 °C; blue curves) with that obtained for the same copolymer (red data) after heating the 20% w/w dispersion for 17 h at (a) 40 °C, (b) 70 °C or (c) 90 °C, respectively.

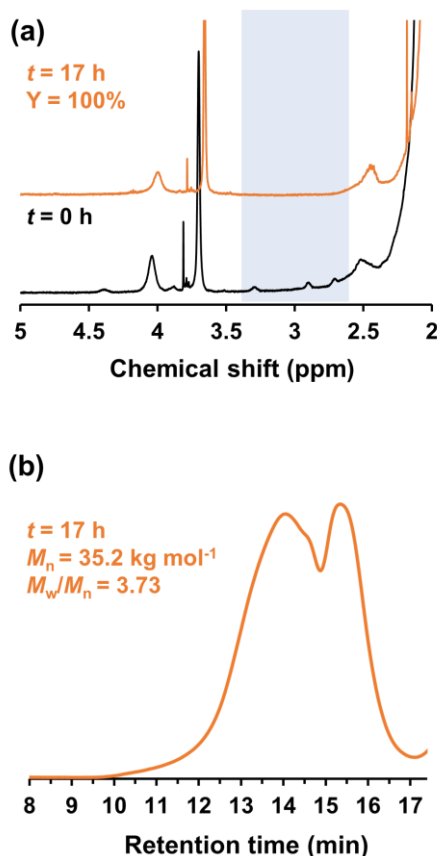

**Figure S10.** (a)  $^1\text{H}$  NMR spectra recorded in  $\text{CD}_2\text{Cl}_2$  for a 1.0% w/w dispersion of P(LMA<sub>50</sub>-stat-GlyMA<sub>9</sub>)-PMMA<sub>67</sub> nanoparticles initially (black spectrum) and then after heating the same dispersion to 110 °C for 17 h (orange spectrum; note the loss of epoxy signals within the shaded blue region). (b) THF GPC curve recorded for the diblock copolymer chains obtained after this heating protocol.



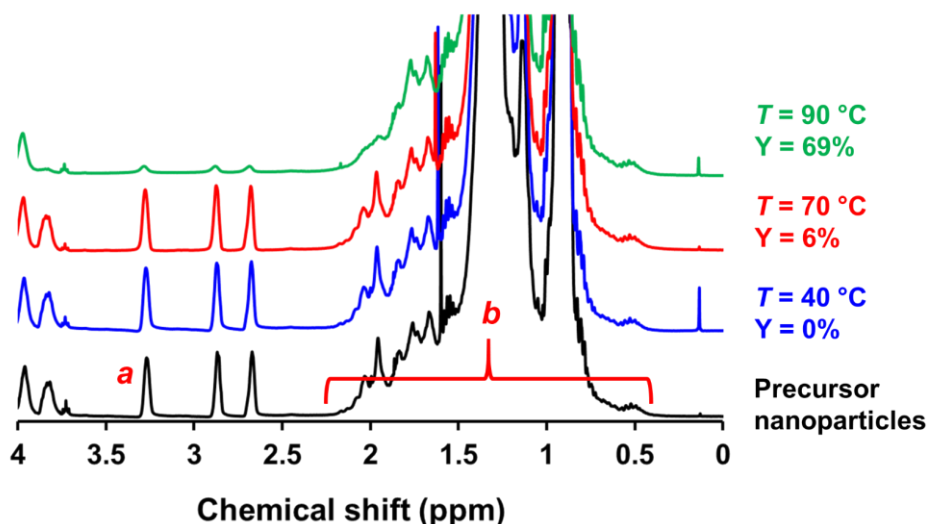

**Figure S11.** <sup>1</sup>H NMR spectra recorded in CD<sub>2</sub>Cl<sub>2</sub> for PLMA<sub>63</sub>-PGlyMA<sub>89</sub> diblock copolymer (black spectrum), the same copolymer after heating a 20% w/w copolymer dispersion in mineral oil for 17 h at 40 °C (blue spectrum), 70 °C (red spectrum) or 90 °C (green spectrum), respectively. In each case, the % loss of the original epoxy groups (Y%) was determined by comparing the aliphatic copolymer backbone at 0.30-2.30 ppm (see signal *b*) to the methine signal *a* corresponding to the epoxy ring at 3.20-3.33 ppm.

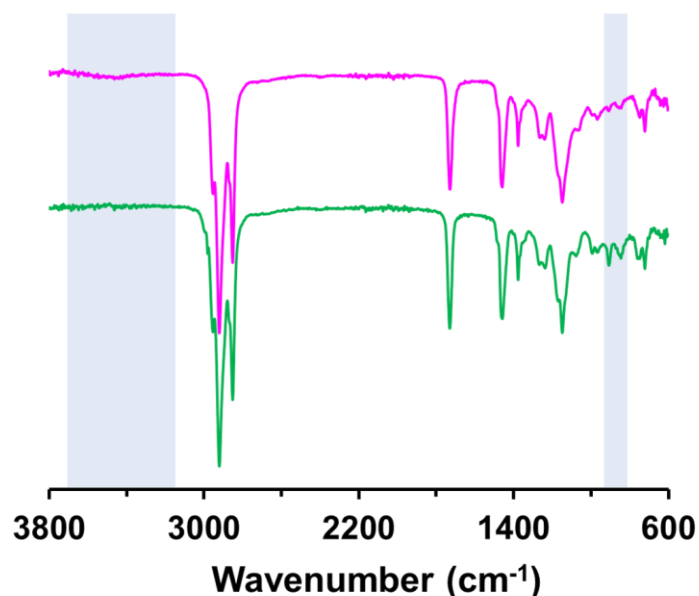

**Figure S12.** FT-IR spectra recorded for PLMA<sub>63</sub>-PGlyMA<sub>89</sub> diblock copolymer (green spectrum) and the same copolymer (pink spectrum) after heating to 110 °C for 17 h in the presence of water.

(a) Carboxylic acid-epoxy addition

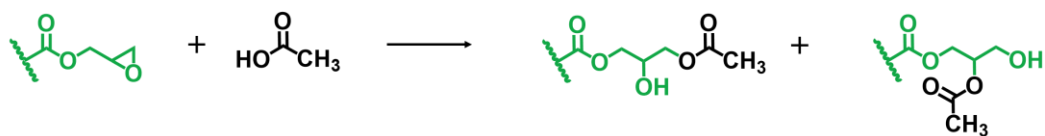

(b) Carboxylic acid-hydroxyl esterification

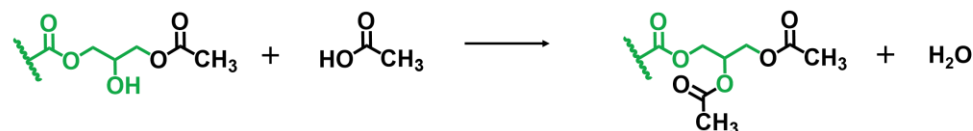

**Scheme S1.** Possible side-reactions that might occur when reacting PLMA<sub>63</sub>-PGlyMA<sub>89</sub> nanoparticles with 50% v/v aqueous acetic acid: (a) epoxy ring-opening with acetic acid and (b) esterification between acetic acid and the pendent hydroxyl groups.
